# Supplementary material for: Composition of Algerian Propolis, Plant Origin, and Its Antiangiogenic Activity In Vitro
Source: MDPI journal article supplement (doi:10.3390/molecules26216510), 2021-10-28
Supplement: s1 [file s1]

## **Supplemental material**

### **Composition of Algerian Propolis, Plant Origin and its Antiangiogenic Activity In Vitro**

Takahiro Hosoya <sup>1,2</sup>, Ikumi Tsuchiya <sup>1</sup>, Toshiro Ohta <sup>1</sup>, Mokhtar Benhanifia <sup>3</sup> and Shigenori Kumazawa <sup>1,\*</sup>

<sup>1</sup> Department of Food and Nutritional Sciences, University of Shizuoka, 52-1 Yada, Suruga-ku, Shizuoka 422-8526, Japan

<sup>2</sup> Department of Nutrition and Health Sciences, Toyo University, 1-1-1, Izumino, Itakura-machi, Ora-gun, Gunma 374-0193, Japan

<sup>3</sup> Department of Agricultural Science, Faculty of Natural and Life Sciences, University Mustapha Stambouli of Mascara, 29000 Algeria

\* Correspondence: kumazawa@u-shizuoka-ken.ac.jp; Tel.: +81-54-264-5523

## Contents

|                                                                                               |   |
|-----------------------------------------------------------------------------------------------|---|
| <b>Figure S1.</b> HR-ESIMS spectrum of <b>1</b> . .....                                       | 3 |
| <b>Figure S2.</b> HR-ESIMS spectrum of <b>2</b> . .....                                       | 3 |
| <b>Figure S3.</b> HR-ESIMS spectrum of <b>3</b> . .....                                       | 4 |
| <b>Figure S4.</b> $^1\text{H}$ NMR spectrum of <b>3</b> (400 MHz, acetone- $d_6$ ). .....     | 4 |
| <b>Figure S5.</b> $^{13}\text{C}$ NMR spectrum of <b>3</b> (100 MHz, acetone- $d_6$ ). .....  | 5 |
| <b>Figure S6.</b> HSQC spectrum of <b>3</b> (acetone- $d_6$ ). .....                          | 5 |
| <b>Figure S7.</b> HMBC spectrum of <b>3</b> (acetone- $d_6$ ). .....                          | 6 |
| <b>Figure S8.</b> HR-ESIMS spectrum of <b>5</b> . .....                                       | 7 |
| <b>Figure S9.</b> $^1\text{H}$ NMR spectrum of <b>5</b> (400 MHz, acetone- $d_6$ ). .....     | 7 |
| <b>Figure S10.</b> $^{13}\text{C}$ NMR spectrum of <b>5</b> (100 MHz, acetone- $d_6$ ). ..... | 8 |
| <b>Figure S11.</b> HR-ESIMS spectrum of <b>4</b> . .....                                      | 9 |
| <b>Figure S12.</b> HR-ESIMS spectrum of <b>6</b> . .....                                      | 9 |

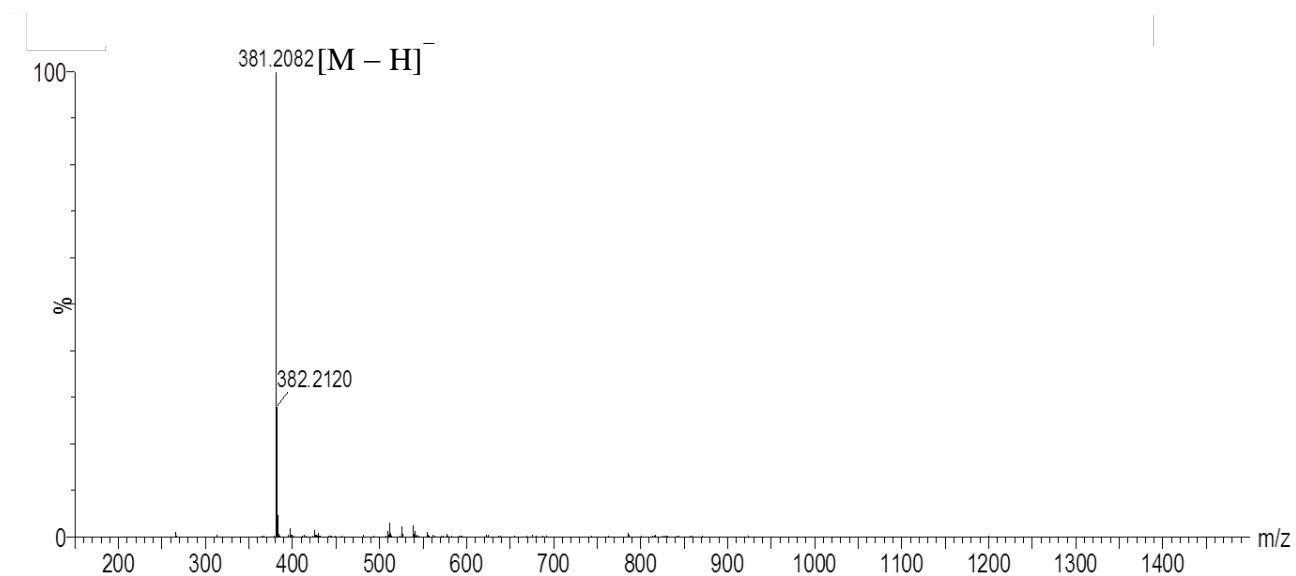

**Figure S1.** HR-ESIMS spectrum of **1**.

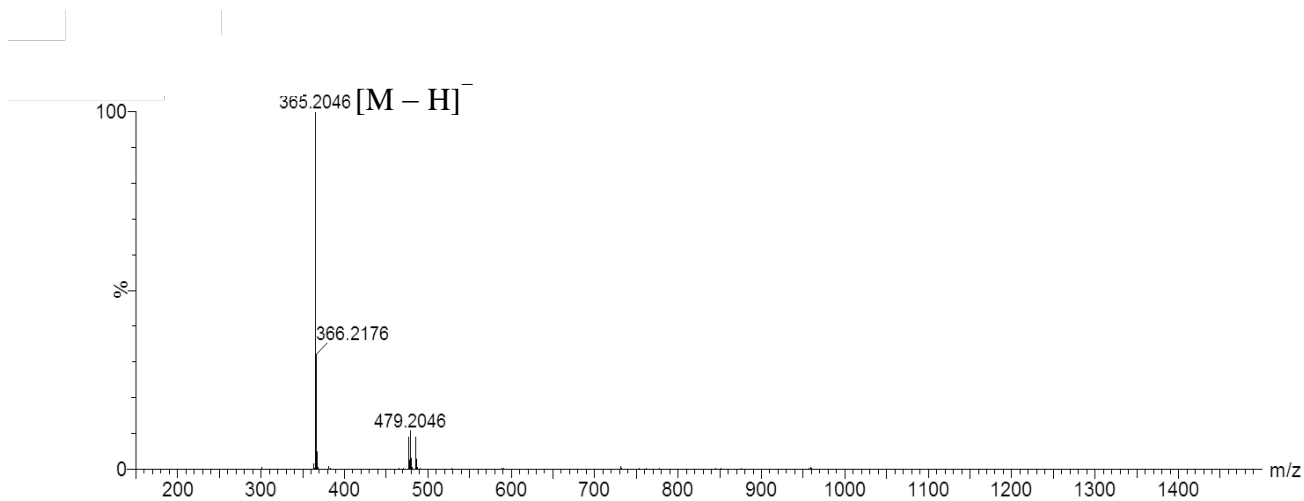

**Figure S2.** HR-ESIMS spectrum of **2**.

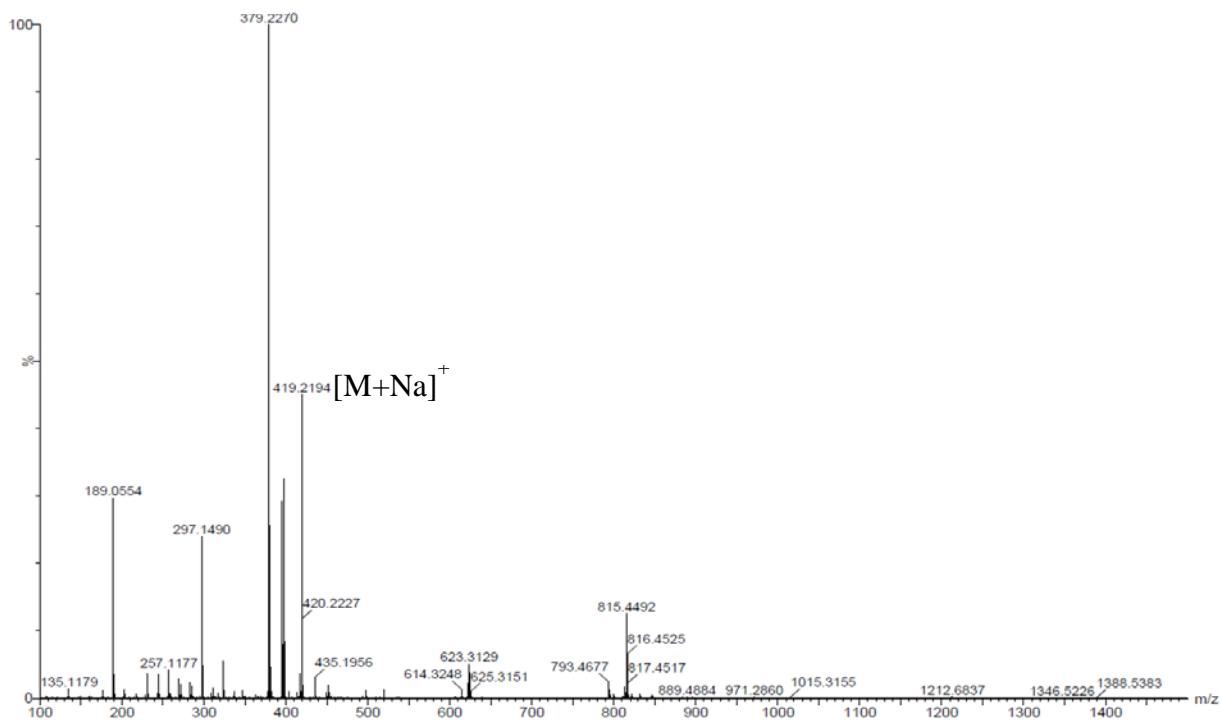

**Figure S3.** HR-ESIMS spectrum of **3**.

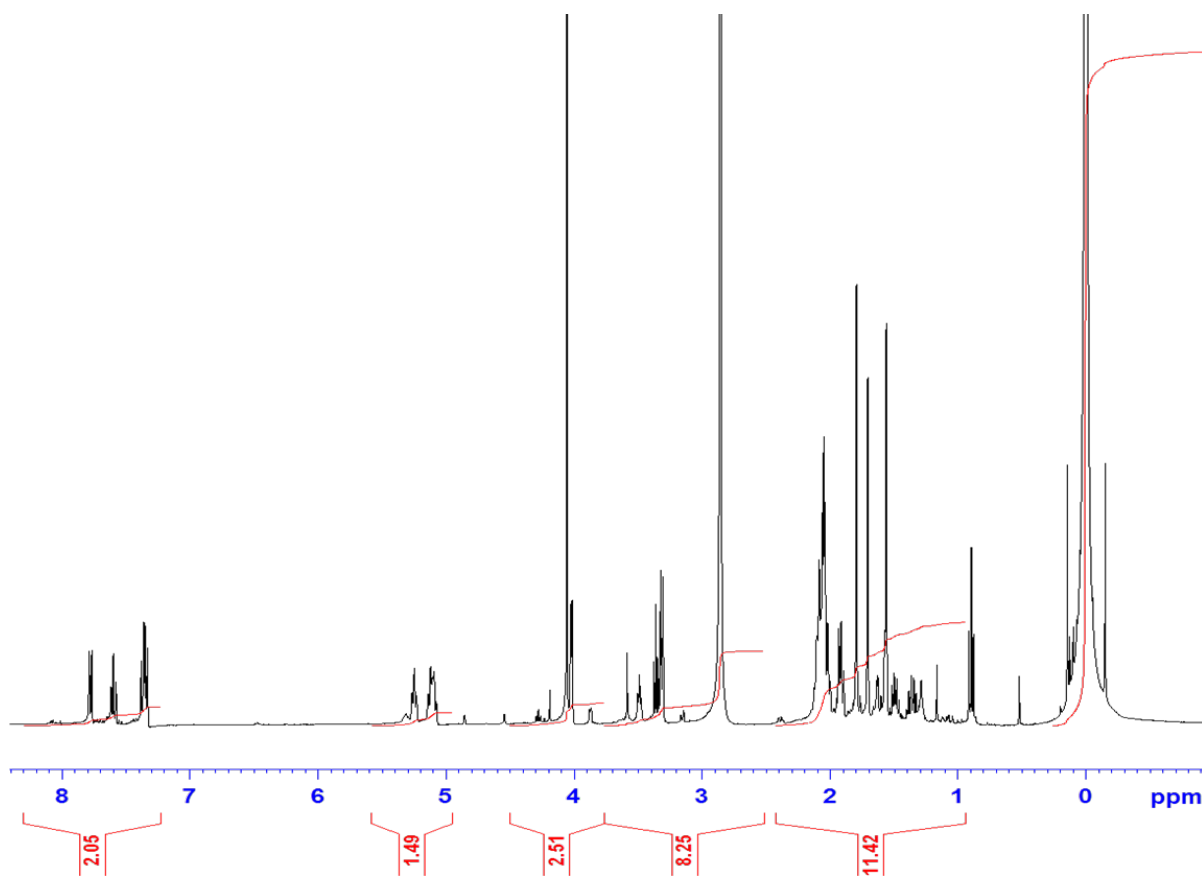

**Figure S4.**  $^1\text{H}$  NMR spectrum of **3** (400 MHz, acetone- $d_6$ ).

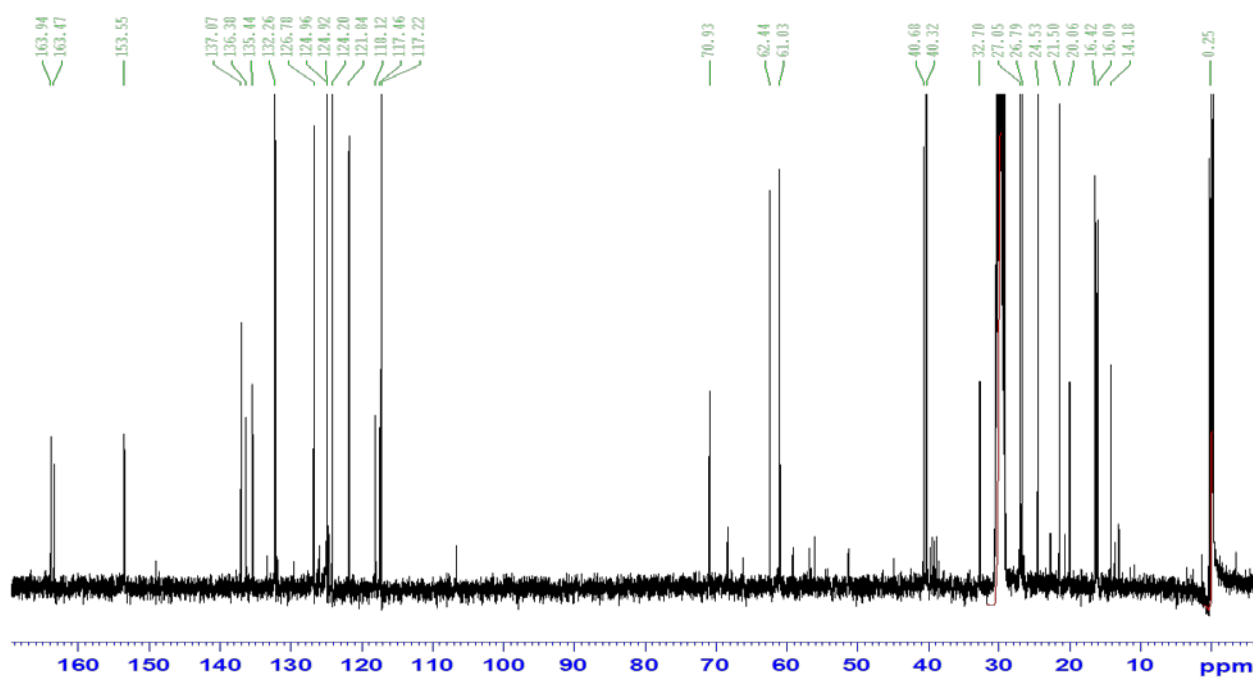

**Figure S5.**  $^{13}\text{C}$  NMR spectrum of **3** (100 MHz, acetone- $d_6$ ).

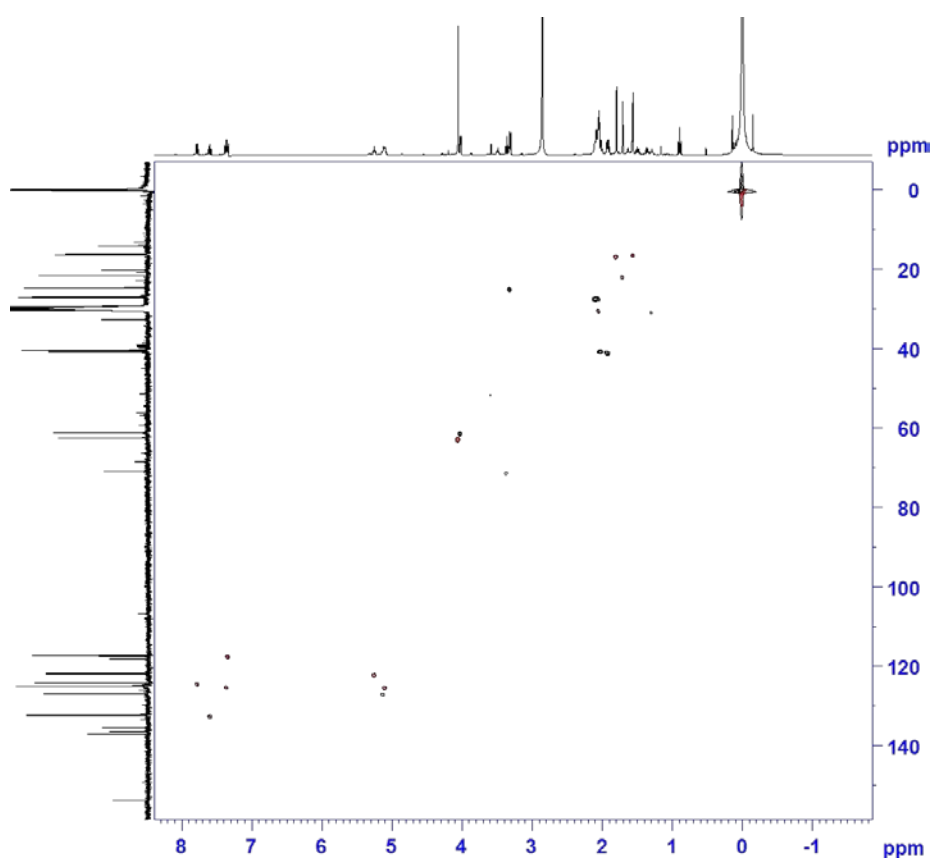

**Figure S6.** HSQC spectrum of **3** (acetone- $d_6$ ).

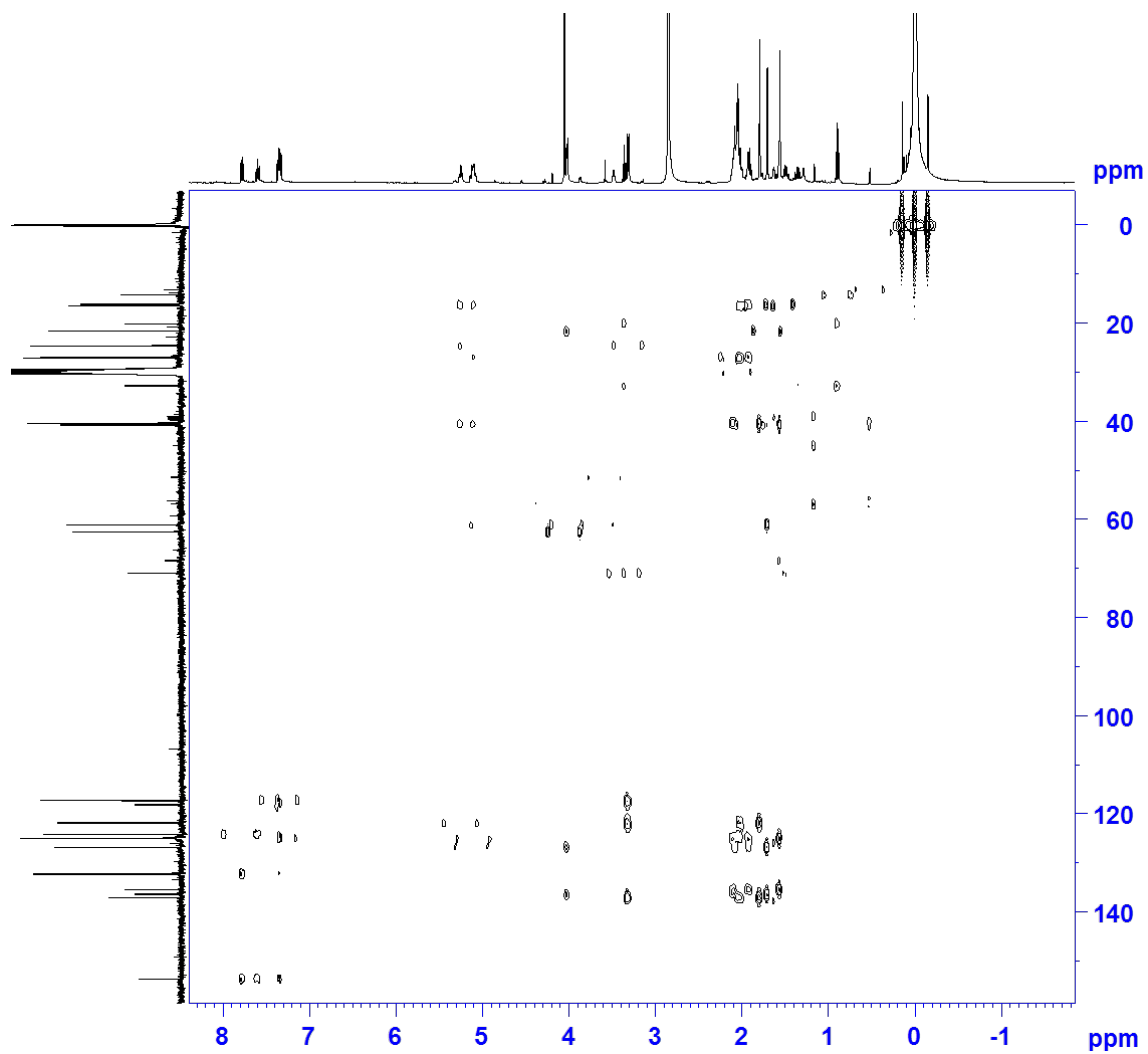

**Figure S7.** HMBC spectrum of **3** (acetone- $d_6$ ).

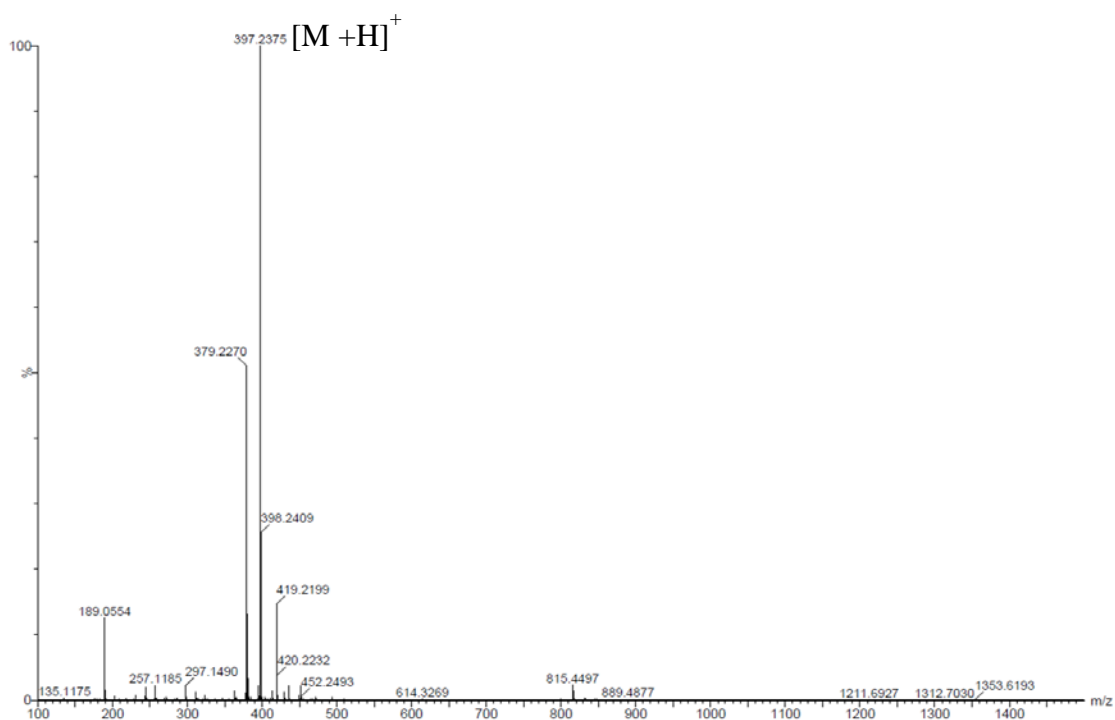

**Figure S8.** HR-ESIMS spectrum of **5**.

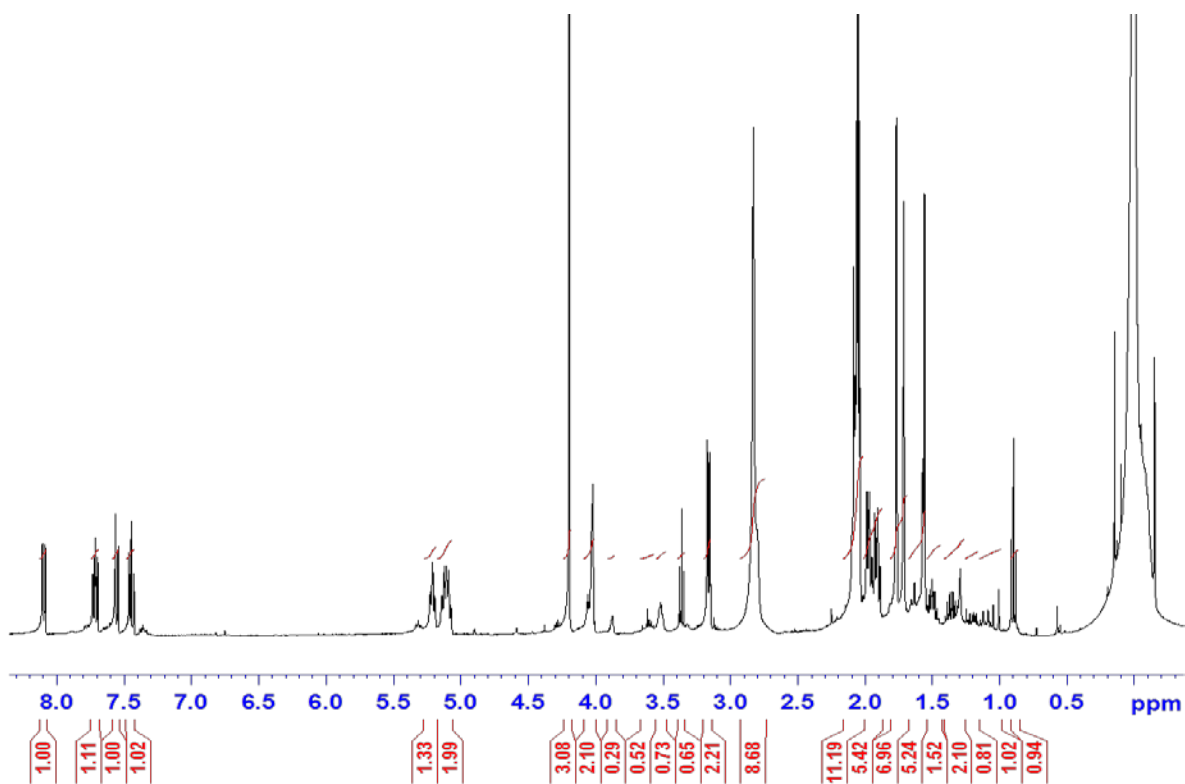

**Figure S9.**  $^1\text{H}$  NMR spectrum of **5** (400 MHz, acetone- $d_6$ ).

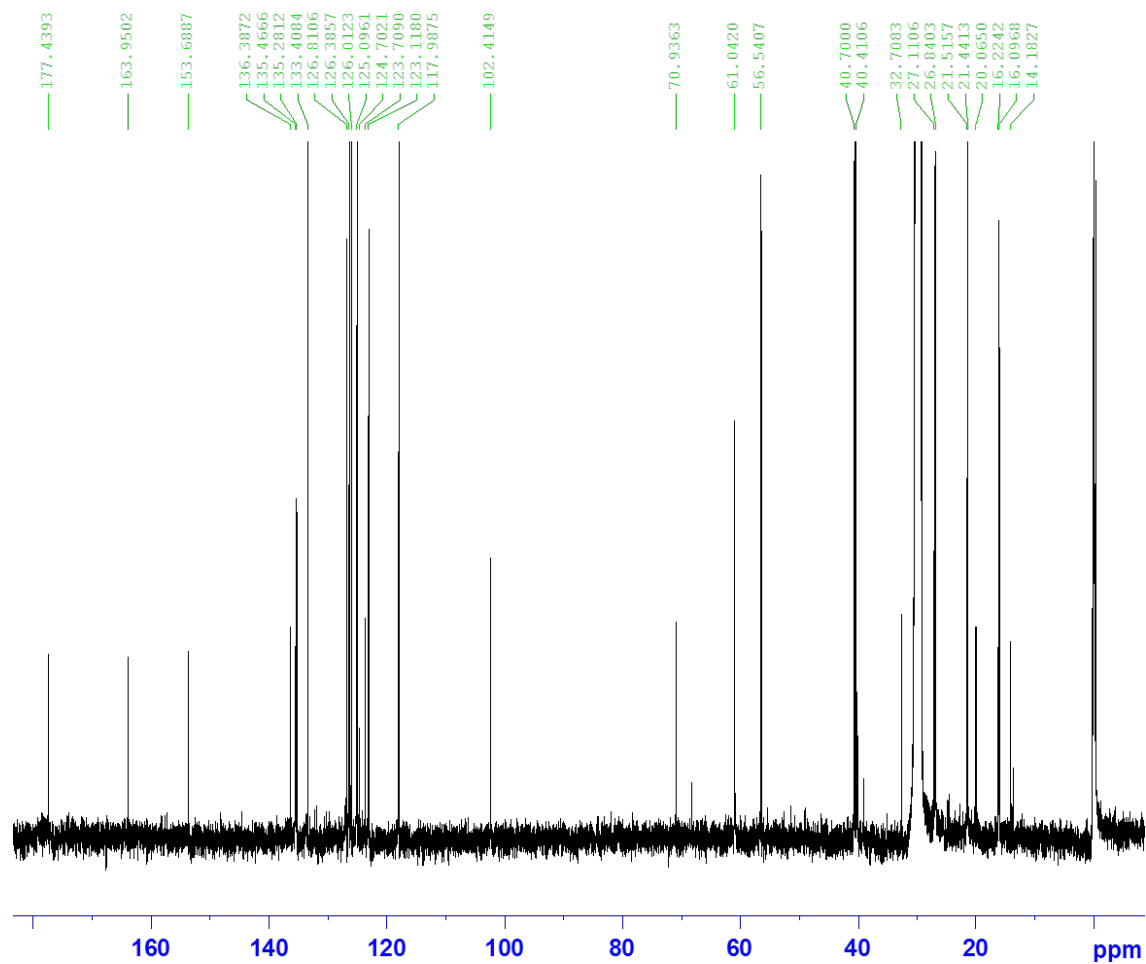

**Figure S10.**  $^{13}\text{C}$  NMR spectrum of **5** (100 MHz, acetone- $d_6$ ).



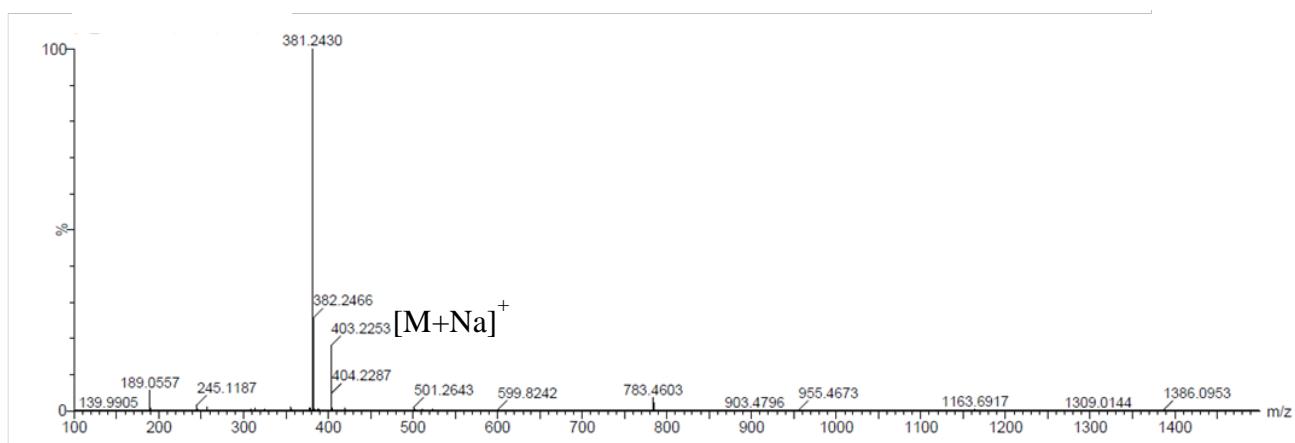

**Figure S11.** HR-ESIMS spectrum of **4**.

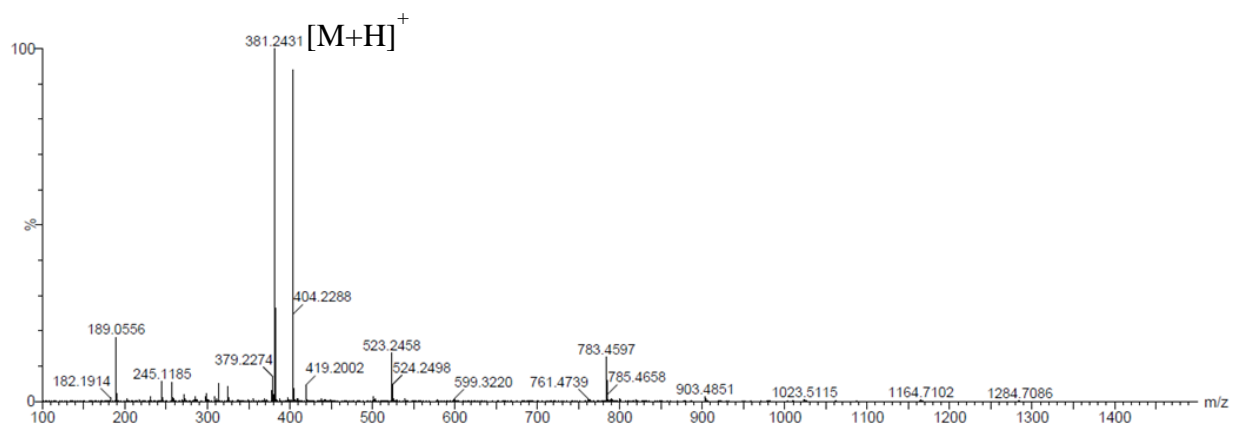

**Figure S12.** HR-ESIMS spectrum of **6**.
